# Supplementary material for: Mathematical study of neural feedback roles in small target motion detection
Source: Frontiers journal article supplement (doi:10.3389/fnbot.2022.984430), 2022-09-20
Supplement: Data_Sheet_1.ZIP [file Data_Sheet_1.ZIP]

**A**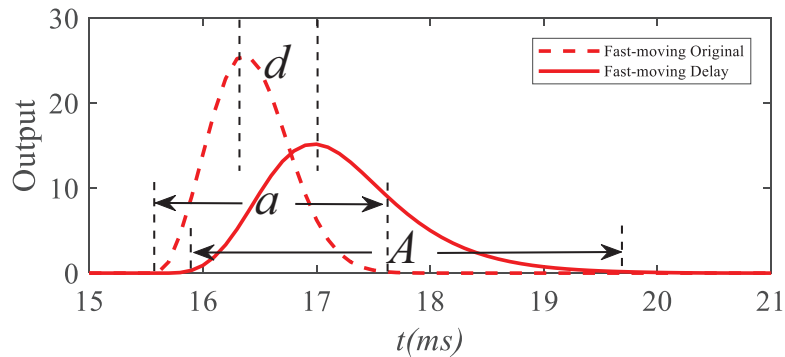

Original STMD output and  
feedback delay signal to fast-  
moving small target.

**B**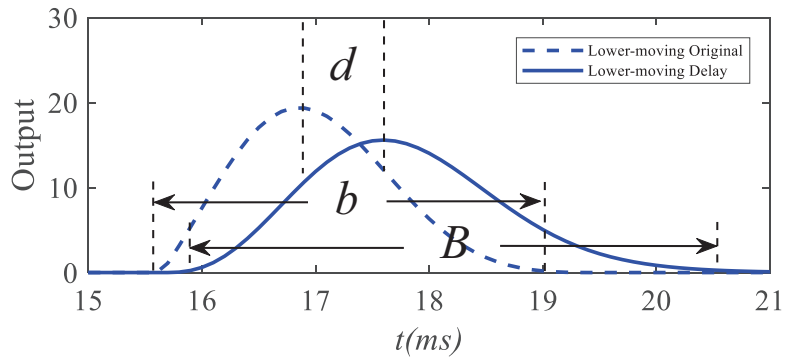

Original STMD output and  
feedback delay signal to lower-  
moving small target.
