# Supplementary material for: Mathematical study of neural feedback roles in small target motion detection
Source: Frontiers journal article supplement (doi:10.3389/fnbot.2022.984430), 2022-09-20
Supplement: Data_Sheet_1.ZIP [file Data_Sheet_1.ZIP]

**A**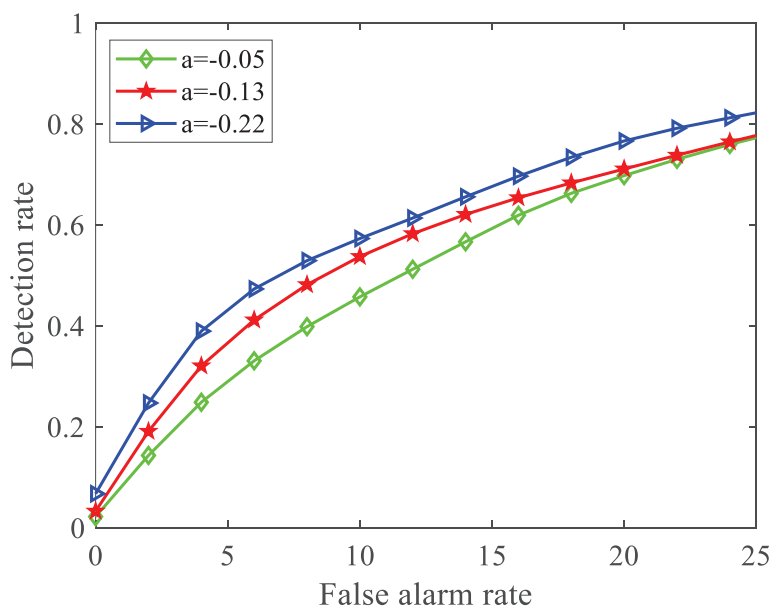

The detection rate for different feedback constant  $a$

**B**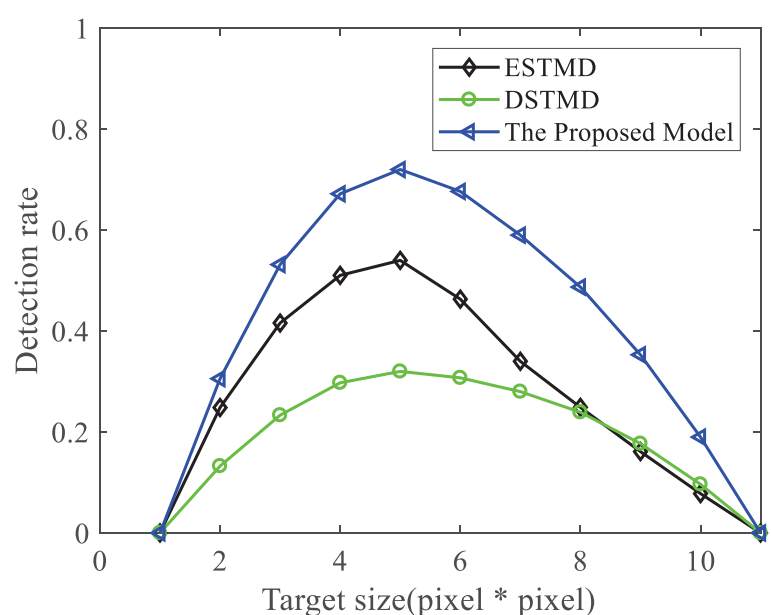

The detection rate for different target size

**C**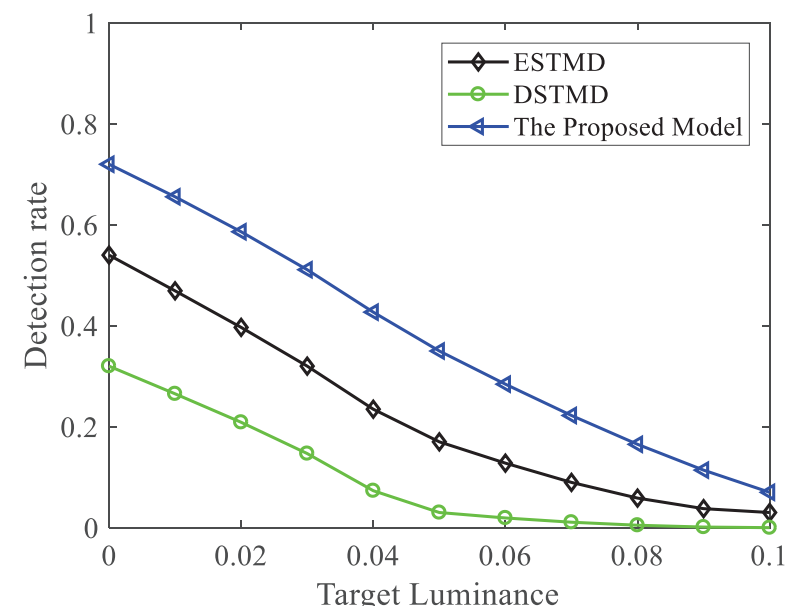

The detection rate for different target luinance

**D**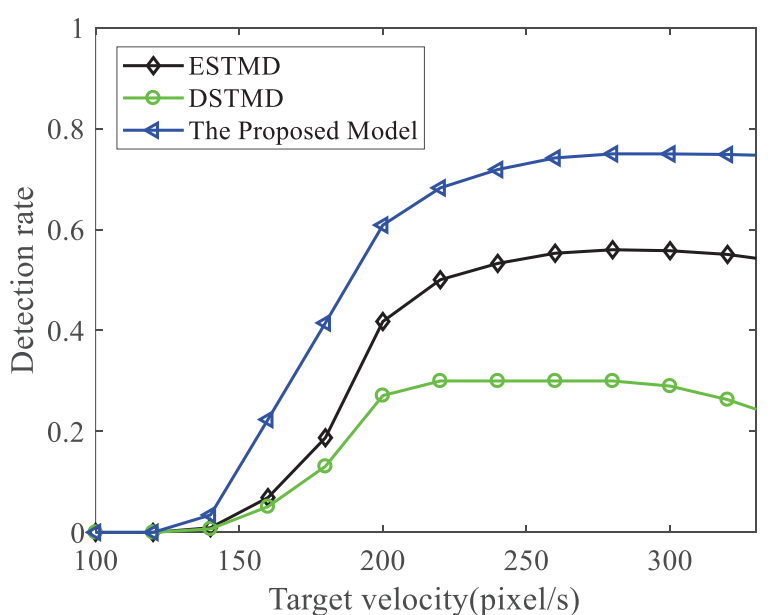

The detection rate for different target velocity

**E**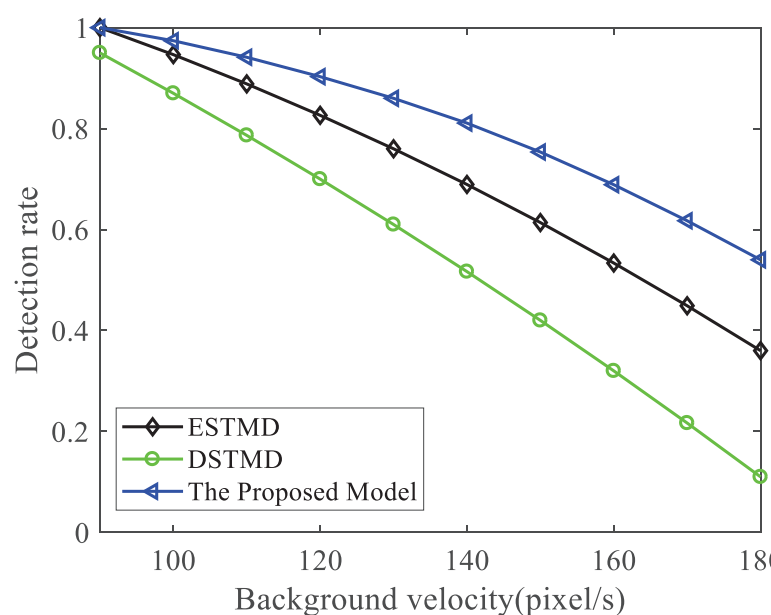

The detection rate for different background velocity

**F**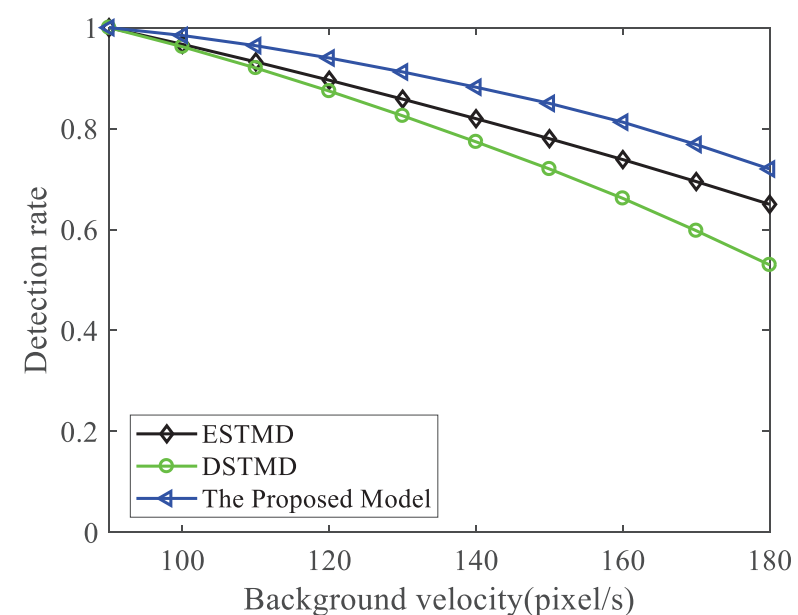

The detection rate for different background velocity
