# Supplementary material for: Mathematical study of neural feedback roles in small target motion detection
Source: Frontiers journal article supplement (doi:10.3389/fnbot.2022.984430), 2022-09-20
Supplement: Presentation_1.pdf [file Presentation_1.pdf]

# The Proof of Theorem

Jun Ling<sup>1</sup>, Hongxin Wang<sup>2,3</sup>, Mingshuo Xu<sup>1</sup>, Hao Chen<sup>1</sup>, Haiyang Li<sup>1,\*</sup> and Jigen Peng<sup>1,\*</sup>

<sup>1</sup> School of Mathematics and Information Science, Guangzhou University, Guangzhou 510006, China

<sup>2</sup> Machine Life and Intelligence Research Center, Guangzhou University, Guangzhou 510006, China

<sup>3</sup> Computational Intelligence Lab (CIL), School of Computer Science, University of Lincoln, Lincoln, LN6 7TS, UK

Correspondence\*:

Haiyang Li & Jigen Peng

fplihaiyang@126.com & jgpeng@gzhu.edu.cn

In this section, we mainly prove all the Theorems. Let's rewrite the equation as follows

$$\begin{aligned} (FD)(t) &= [(P * H)(t) + a(D * V)(t)]^- * \Gamma_3(t) \\ &\quad \times [(P * H)(t) + a(D * V)(t)]^+ \\ &= \frac{1}{2} ((P * H)(t) + a(D * V)(t)) * \Gamma_3(t) \\ &\quad - ((P * S)(t) + a(D * K)(t)) \\ &\quad \times \frac{1}{2} ((P * H)(t) + a(D * V)(t)) \\ &\quad + (P * H)(t) + a(D * V)(t), \end{aligned} \quad (1)$$

Adopting Hölder's inequality and  $(H_1)$ , we deduce that

$$\begin{aligned} 2\|FD\|_{L^2} &\leq \|P\|_{L^2}^2 \|H\|_{L^2} \|\Gamma_3\|_{L^2} \|H\|_{L^1} T^{\frac{1}{2}} + |a| T^{\frac{1}{2}} \\ &\quad \|P\|_{L^2} \|H\|_{L^2} \|\Gamma_3\|_{L^2} \|V\|_{L^1} \|D\|_{L^2} \\ &\quad + \|P\|_{L^2} \|H\|_{L^2} \|P\|_{L^2} \|S\|_{L^2} T^{\frac{1}{2}} \\ &\quad + |a| \|P\|_{L^2} \|H\|_{L^2} \|K\|_{L^2} \|D\|_{L^2} T^{\frac{1}{2}} \\ &\quad + |a| \|D\|_{L^2} \|V\|_{L^2} \|\Gamma_3\|_{L^2} \|H\|_{L^1} T^{\frac{1}{2}} \\ &\quad + a^2 \|D\|_{L^2}^2 \|V\|_{L^2} \|\Gamma_3\|_{L^2} \|V\|_{L^1} T^{\frac{1}{2}} \\ &\quad + |a| \|D\|_{L^2} \|V\|_{L^2} T^{\frac{1}{2}} \|P\|_{L^2} \|S\|_{L^2} \\ &\quad + a^2 \|D\|_{L^2}^2 \|V\|_{L^2} \|K\|_{L^2} T^{\frac{1}{2}}, \end{aligned} \quad (2)$$

which implies that  $\|FD\|_{L^2} \leq \infty$ . On the other hand, we notice that  $[(P * H)(t) + a(D * V)(t)]^+ \geq 0$  and  $[(P * H + aD * V)^- * \Gamma_{n_3, \tau_3}](t) \geq 0$ , it easily follows that  $F(L^2([0, T], R_+)) \subset L^2([0, T], R_+)$ . The proof is completed.

**THE PROOF OF THEOREM 4.** By equation (1) and the properties of absolute value  $|\cdot|$ , we have

$$\begin{aligned} 2|(FD)(t)| &\leq |(P * H)(t)| |P * H * \Gamma_3(t)| + |(P * H)(t)| \\ &\quad \times |aD * V * \Gamma_3(t)| + |(P * H)(t)| \\ &\quad \times |(P * S)(t)| + |(P * H)(t)| |a(D * K)(t)| \\ &\quad + |a(D * V)(t)| |(P * S)(t)| + |a(D * V)(t)| \\ &\quad \times |a(D * K)(t)| + |a(D * V)(t)| |(P * H)| \\ &\quad * \Gamma_3(t) + |a(D * V)(t)| |aD * V * \Gamma_3(t)|. \end{aligned}$$

**THE PROOF OF THEOREM 5.** Let  $\{D_n\}$  and  $D_0 \in L^2([0, T], R_+)$  such that  $\|D_n - D_0\|_{L^2} \rightarrow 0$  as  $n \rightarrow \infty$ . By applying equation (1) and the properties of absolute value  $|\cdot|$ , we obtain

$$\begin{aligned} &|(FD_n)(t) - (FD_0)(t)| \\ &\leq |[(P * H + aD_n * V)^- - (P * H + aD_0 * V)^-] \\ &\quad * \Gamma_3(t) \times [P * H(t) + aD_0 * V(t)]^+| \\ &\quad + |[(P * H(t) + aD_n * V(t))^+ - (P * H(t) \\ &\quad + aD_0 * V(t))^+] \times [(P * H + aD_n * V)^- * \Gamma_3(t)]|. \end{aligned}$$

By using  $f^+ = (|f| + f)/2$  and  $f^- = (|f| - f)/2$ , we have

$$\begin{aligned} & 2|(FD_n)(t) - (FD_0)(t)| \\ & \leq (|a(D_n - D_0) * V| * \Gamma_3)(t) + |a(D_n - D_0) * K(t)| \\ & \quad \times (|P * H(t)| + |aD_0 * V(t)|) + (|a(D_n - D_0) * V(t)|) \\ & \quad \times (|P * H| * \Gamma_3(t) + |aD_n * V| * \Gamma_3(t)). \end{aligned} \quad (3)$$

Using Hölder's inequality and  $(H_1)$ , we get

$$\begin{aligned} & \|FD_n - FD_0\|_{L^2} \\ & \leq (|a| \|V\|_{L^2} \|\Gamma_3\|_{L^2} \|P\|_{L^2} \|H\|_{L^1} T^{\frac{1}{2}} + a^2 \|V\|_{L^2} \\ & \quad \times \|\Gamma_3\|_{L^2} \|D_n\|_{L^2} \|V\|_{L^1} T^{\frac{1}{2}} + \frac{1}{2} |a| \|P\|_{L^2} \|H\|_{L^2} \\ & \quad \times \|\Gamma_3\|_{L^2} \|V\|_{L^1} T^{\frac{1}{2}} + \frac{1}{2} |a| \|P\|_{L^2} \|H\|_{L^2} \|K\|_{L^2} T^{\frac{1}{2}} \\ & \quad + \frac{1}{2} a^2 \|D_0\|_{L^2} \|V\|_{L^2} \|\Gamma_3\|_{L^2} \|V\|_{L^1} T^{\frac{1}{2}} \\ & \quad + \frac{1}{2} a^2 \|D_0\|_{L^2} \|V\|_{L^2} \|K\|_{L^2} T^{\frac{1}{2}}) \times \|D_n - D_0\|_{L^2} \\ & = Q \|D_n - D_0\|_{L^2}, \end{aligned} \quad (4)$$

which by (4) yields that

$$\lim_{n \rightarrow \infty} \|FD_n - FD_0\|_{L^2} = 0. \quad (5)$$

Therefore  $F$  is continuous. The proof is completed.

**THE PROOF OF THEOREM 6.** To show the compactness of operator  $F$ , it only needs to prove that the operator  $F$  maps bounded sets  $S$  of  $L^2([0, T], R_+)$  into a sequentially compact set. It means that we need to prove  $F(S)$  is a sequentially compact set. Let  $S$  be a bounded set of  $L^2([0, T], R_+)$ , there exists a real number  $M > 0$  such that  $\|D\|_{L^2} \leq M$ , for any  $D \in S$ . We will derive  $F(S)$  is a sequentially compact set in the following two steps. Firstly, we prove  $F(S)$  is bounded. It follows from the (1) that

$$\begin{aligned} 2\|FD\|_{L^2} & \leq \|P\|_{L^2}^2 \|H\|_{L^2} \|\Gamma_3\|_{L^2} \|H\|_{L^1} T^{\frac{1}{2}} + |a| T^{\frac{1}{2}} \|P\|_{L^2} \\ & \quad \times \|H\|_{L^2} \|\Gamma_3\|_{L^2} \|V\|_{L^1} \|D\|_{L^2} + \|P\|_{L^2} \|H\|_{L^2} \\ & \quad \times \|P\|_{L^2} \|S\|_{L^2} T^{\frac{1}{2}} + |a| \|P\|_{L^2} \|H\|_{L^2} \|K\|_{L^2} \\ & \quad \times \|D\|_{L^2} T^{\frac{1}{2}} + |a| \|D\|_{L^2} \|V\|_{L^2} \|\Gamma_3\|_{L^2} T^{\frac{1}{2}} \\ & \quad \times \|H\|_{L^1} + a^2 \|D\|_{L^2}^2 \|V\|_{L^2} \|\Gamma_3\|_{L^2} \|V\|_{L^1} T^{\frac{1}{2}} \\ & \quad + |a| \|D\|_{L^2} \|V\|_{L^2} \|P\|_{L^2} \|S\|_{L^2} T^{\frac{1}{2}} \\ & \quad + a^2 \|D\|_{L^2}^2 \|V\|_{L^2} \|K\|_{L^2} T^{\frac{1}{2}} \\ & < \infty, \end{aligned} \quad (6)$$

thus establishing condition (i) of Theorem 1. Secondly, we prove condition (ii) of Theorem 1.

Now, let  $\delta > 0$  and  $0 < h < \delta$ , we have

$$\begin{aligned} & |(FD)(t+h) - (FD)(t)| \\ & \leq \frac{1}{2} (|P * (H(t+h) - H(t))| + |aD * (V(t+h) - V(t))|) \\ & \quad \times (|aD * K(t+h)| + |P * H| * \Gamma_3(t+h)| \\ & \quad + |P * S(t+h)| + |aD * V| * \Gamma_3(t+h)|) \\ & \quad + \frac{1}{2} (2|(P * H)| * (\Gamma_3(t+h) - \Gamma_3(t))| \\ & \quad + |aD * V| * (\Gamma_3(t+h) - \Gamma_3(t))| \\ & \quad + |aD * (K(t+h) - K(t))|) \\ & \quad \times (|(P * H)(t)| + |a(D * V)(t)|) \\ & = I_1 + I_2, \end{aligned} \quad (7)$$

for a.e.  $t \in [0, T]$ , where

$$\begin{aligned} 2I_1 & = (|(P * H| * \Gamma_3)(t+h)| + |(P * S)(t+h)| \\ & \quad + (|aD * V| * \Gamma_3)(t+h) + |a(D * K)(t+h)|) \\ & \quad \times |P * (H(t+h) - H(t))| + (|(P * S)(t+h)| \\ & \quad + (|P * H| * \Gamma_3)(t+h) + |a(D * K)(t+h)| \\ & \quad + (|aD * V| * \Gamma_3)(t+h)|) \\ & \quad \times |aD * (V(t+h) - V(t))|. \end{aligned} \quad (8)$$

and

$$\begin{aligned} I_2 & = |P * H| * (\Gamma_3(t+h) - \Gamma_3(t)) (|(P * H)(t)| \\ & \quad + |a(D * V)(t)|) + \frac{1}{2} (|(P * H)(t)| + |a(D * V)(t)|) \\ & \quad \times |aD * V| * (\Gamma_3(t+h) - \Gamma_3(t))| \\ & \quad + \frac{1}{2} (|(P * H)(t)| + |a(D * V)(t)|) \\ & \quad \times |aD * (K(t+h) - K(t))|. \end{aligned}$$

Let us first discuss the  $I_1$ . By applying Hölder's inequality and  $(H_1)$ , we deduce that

$$\begin{aligned} \|I_1\|_{L^2} & \leq \frac{1}{2} (\|\Gamma_3\|_{L^2} \|P\|_{L^2} \|H\|_{L^1} \|P\|_{L^2} T^{\frac{1}{2}} + |a| T^{\frac{1}{2}} \|V\|_{L^1} \\ & \quad \times \|\Gamma_3\|_{L^2} \|D\|_{L^2} \|P\|_{L^2} + \|P\|_{L^2}^2 T^{\frac{1}{2}} \|S\|_{L^2} \\ & \quad + |a| \|D\|_{L^2} \|K\|_{L^2} \|P\|_{L^2} T^{\frac{1}{2}}) \\ & \quad \times \left( \int_R |H(t+h) - H(t)|^2 dt \right)^{\frac{1}{2}} \\ & \quad + \frac{1}{2} (|a| \|\Gamma_3\|_{L^2} \|P\|_{L^2} \|H\|_{L^1} \|D\|_{L^2} T^{\frac{1}{2}} + a^2 T^{\frac{1}{2}} \\ & \quad \times \|\Gamma_3\|_{L^2} \|D\|_{L^2}^2 \|V\|_{L^1} + |a| \|P\|_{L^2} \|S\|_{L^2} T^{\frac{1}{2}} \\ & \quad \times \|D\|_{L^2} + a^2 \|D\|_{L^2}^2 \|K\|_{L^2} T^{\frac{1}{2}}) \\ & \quad \times \left( \int_R |V(t+h) - V(t)|^2 dt \right)^{\frac{1}{2}}. \end{aligned} \quad (9)$$

Equation (9) can be expressed as

$$\|I_1\|_{L^2} \leq A_1 \left( \int_R |H(t+h) - H(t)|^2 dt \right)^{\frac{1}{2}} + B_1 \left( \int_R |V(t+h) - V(t)|^2 dt \right)^{\frac{1}{2}}. \quad (10)$$

Now, we discuss  $I_2$  in a same way. By applying Hölder's inequality, we get that

$$\begin{aligned} \|I_2\|_{L^2} &\leq (\|P\|_{L^2} \|H\|_{L^2} \|P\|_{L^2} \|H\|_{L^1} T^{\frac{1}{2}} + |a| \|D\|_{L^2} T^{\frac{1}{2}} \\ &\quad \times \|V\|_{L^2} \|H\|_{L^1} \|P\|_{L^2} + \frac{1}{2} |a| \|P\|_{L^2} \|H\|_{L^2} T^{\frac{1}{2}} \\ &\quad \times \|D\|_{L^2} \|V\|_{L^1} + \frac{1}{2} a^2 \|D\|_{L^2}^2 \|V\|_{L^2} \|V\|_{L^1} T^{\frac{1}{2}}) \\ &\quad \times \left( \int_R |\Gamma_3(t+h) - \Gamma_3(t)|^2 dt \right)^{\frac{1}{2}} + \frac{1}{2} \\ &\quad \times (\|P\|_{L^2} \|H\|_{L^2} \|D\|_{L^2} T^{\frac{1}{2}} + \|D\|_{L^2}^2 \|V\|_{L^2} T^{\frac{1}{2}}) \\ &\quad \times \left( \int_R |K(t+h) - K(t)|^2 dt \right)^{\frac{1}{2}}. \end{aligned} \quad (11)$$

Equation (11) can be expressed as

$$\|I_2\|_{L^2} \leq A_2 \left( \int_R |\Gamma_3(t+h) - \Gamma_3(t)|^2 dt \right)^{\frac{1}{2}} + B_2 \left( \int_R |K(t+h) - K(t)|^2 dt \right)^{\frac{1}{2}}. \quad (12)$$

It follows from the (12) and (10) that

$$\begin{aligned} &\|(FD)(\cdot+h) - (FD)(\cdot)\|_{L^2} \\ &\leq A_1 \left( \int_R |H(t+h) - H(t)|^2 dt \right)^{\frac{1}{2}} + B_1 \left( \int_R |V(t+h) - V(t)|^2 dt \right)^{\frac{1}{2}} + A_2 \left( \int_R |\Gamma_3(t+h) - \Gamma_3(t)|^2 dt \right)^{\frac{1}{2}} \\ &\quad + B_2 \left( \int_R |K(t+h) - K(t)|^2 dt \right)^{\frac{1}{2}}, \end{aligned} \quad (13)$$

where  $A_1, A_2, B_1, B_2$  are positive real numbers. In order to prove that condition (ii) of Theorem 1, we discuss the right of the equation (13). Since  $C_c(R)$  is dense in  $L^2(R)$ . Therefore for any  $H(t) \in L^2(R)$  and  $\epsilon > 0$  there exists a function  $g \in C_c(R)$  such that  $\|H - g\|_{L^2} \leq \frac{\epsilon}{12A_1}$ . Applying continuity of function  $g(t)$ , it follows that we can choose  $\delta_1 > 0$  with  $0 < h < \delta_1$  such that  $(\int_R |g(t+h) - g(t)|^2 dt)^{\frac{1}{2}} < \frac{\epsilon}{12A_1}$ . Therefore for  $0 < h < \delta_1$ , we have

$$\begin{aligned} &\|H(\cdot+h) - H(\cdot)\|_{L^2} \\ &\leq \left( \int_R |H(t+h) - g(t+h)|^2 dt \right)^{\frac{1}{2}} + \left( \int_R |g(t+h) - g(t)|^2 dt \right)^{\frac{1}{2}} + \left( \int_R |g(t) - H(t)|^2 dt \right)^{\frac{1}{2}} \\ &< \frac{\epsilon}{12A_1} \times 3 = \frac{\epsilon}{4A_1}. \end{aligned} \quad (14)$$

In same way, we can choose  $\delta_2, \delta_3$  and  $\delta_4 > 0$  with  $0 < h < \delta_2, 0 < h < \delta_3$  and  $0 < h < \delta_4$  such that

$(\int_R |V(t+h) - V(t)|^2 dt)^{\frac{1}{2}} < \frac{\epsilon}{4B_1}, (\int_R |\Gamma_3(t+h) - \Gamma_3(t)|^2 dt)^{\frac{1}{2}} < \frac{\epsilon}{4A_2}$  and  $(\int_R |K(t+h) - K(t)|^2 dt)^{\frac{1}{2}} < \frac{\epsilon}{4B_2}$ . Therefore we can take  $\delta = \min\{\delta_1, \delta_2, \delta_3, \delta_4\}$  with  $0 < h < \delta$  such that

$$\left( \int_{[0,T]} |(FD)(t+h) - (FD)(t)|^2 dt \right)^{\frac{1}{2}} < \epsilon. \quad (15)$$

Thanks to (15), it is clear that condition (ii) of Theorem 1 is satisfied. Further, it follows from the Theorem 1 that  $F(S)$  is a sequentially compact set. The proof is completed.

**THE PROOF OF THEOREM 7.** Let  $r$  be a positive real number and consider the closed, convex and bounded set  $B_r$  of  $L^2$ , which is defined by

$$B_r = \{D \in L^2([0, T], R_+), \|D\|_{L^2} \leq r\}.$$

For any  $D \in B_r$ . From (1), it immediately follows that

$$\begin{aligned} |(FD)(t)| &\leq \frac{1}{2} (|P * S(t)| + |P * H| * \Gamma_3(t)| + |aD * K(t)| \\ &\quad + |aD * V| * \Gamma_3(t)|) \times (|(P * H)(t)| \\ &\quad + |a(D * V)(t)|). \end{aligned} \quad (16)$$

By simple calculation, we deduce that

$$\begin{aligned} \|FD\|_{L^2} &\leq \frac{1}{2} \|P\|_{L^2}^2 \|H\|_{\infty} \|S\|_{\infty} T^{\frac{3}{2}} + \frac{1}{2} \|P\|_{L^2}^2 \|H\|_{\infty} T^{\frac{3}{2}} \\ &\quad \times \|H\|_{L^1} \|\Gamma_3\|_{\infty} - \frac{a}{2} (\|P\|_{L^2} \|H\|_{\infty} \|K\|_{\infty} T^{\frac{3}{2}} \\ &\quad + \|P\|_{L^2} \|H\|_{\infty} \|\Gamma_3\|_{L^2} \|V\|_{L^1} T + \|P\|_{L^2} T^{\frac{3}{2}} \\ &\quad \times \|S\|_{\infty} \|V\|_{\infty} + \|P\|_{L^2} \|H\|_{L^1} \|\Gamma_3\|_{\infty} \|V\|_{\infty} \\ &\quad \times T^{\frac{3}{2}}) \|D\|_{L^2} + \frac{a^2}{2} (\|V\|_{\infty} T \|V\|_{L^1} \|\Gamma_3\|_{L^2} \\ &\quad + \|V\|_{\infty} \|K\|_{\infty} T^{\frac{3}{2}}) \|D\|_{L^2}^2. \end{aligned}$$

Let  $N' = \frac{1}{2} \|V\|_{\infty} \|V\|_{L^1} T \|\Gamma_3\|_{L^2} + \frac{1}{2} \|V\|_{\infty} T^{\frac{3}{2}} \|K\|_{\infty}, \varphi = \frac{1}{2} \|P\|_{L^2}^2 \|H\|_{\infty} \|S\|_{\infty} T^{\frac{3}{2}} + \frac{1}{2} \|P\|_{L^2}^2 \|H\|_{\infty} \|H\|_{L^1} \|\Gamma_3\|_{\infty} T^{\frac{3}{2}},$  and  $Q = \frac{1}{2} (\|P\|_{L^2} \|H\|_{\infty} \|K\|_{\infty} T^{\frac{3}{2}} + \|P\|_{L^2} \|H\|_{\infty} \|V\|_{L^1} \|\Gamma_3\|_{L^2} T + \|P\|_{L^2} \|S\|_{\infty} \|V\|_{\infty} T^{\frac{3}{2}} + \|P\|_{L^2} \|H\|_{L^1} T^{\frac{3}{2}} \|\Gamma_3\|_{\infty} \|V\|_{\infty}),$  then we obtain

$$\|(FD)\|_{L^2} \leq \varphi - aQ \|D\|_{L^2} + a^2 N' \|D\|_{L^2}^2. \quad (17)$$

Now, we consider the equation

$$\varphi - aQr + a^2 N' r^2 \leq r. \quad (18)$$

has solutions. Let

$$b^2 - 4ac = a^2(Q^2 - 4N'\varphi) + 2aQ + 1 \geq 0. \quad (19)$$

In order to get our conclusions, we need to discuss three cases. We first consider the following case1:

Case1: If  $Q^2 - 4N'\varphi = 0$ , we derive from (19) that  $a \in [-\frac{1}{2Q}, 0)$ . Furthermore, by plugging  $a$  into (18), we get

$$\frac{(aQ+1) - \sqrt{2aQ+1}}{2a^2N'} \leq r \leq \frac{(aQ+1) + \sqrt{2aQ+1}}{2a^2N'}. \quad (20)$$

Moreover, when  $a \in [-\frac{1}{2Q}, 0)$ , we have

$$\frac{(aQ+1) - \sqrt{2aQ+1}}{2a^2N'} \geq 0. \quad (21)$$

Therefore, we conclude that  $F(B_r) \subset B_r$ . By applying Theorem 3, we can get that the equation (1) has at least one solution on  $B_r = \{D \in L^2([0, T], R_+), \|D\|_{L^2} \leq r\}$ . It is clear that condition (i) of Theorem 7 is satisfied.

Now, we consider the case2:

Case2: If  $Q^2 - 4N'\varphi > 0$ , by using (19), we easily get  $a \in [\frac{-1}{Q-2\sqrt{N'\varphi}}, \frac{-1}{Q+2\sqrt{N'\varphi}}]$ . Furthermore, applying  $aQ+1 > 0$ , we get  $a \in (-\frac{1}{Q}, 0)$ . Using  $a \in [\frac{-1}{Q-2\sqrt{N'\varphi}}, \frac{-1}{Q+2\sqrt{N'\varphi}}]$  and together with  $a \in [-\frac{1}{Q}, 0)$ , we can get  $a \in (-\frac{1}{Q}, \frac{-1}{Q+2\sqrt{N'\varphi}}]$ . By substituting  $a$  into (18), we have

$$\frac{(aQ+1) - \sqrt{(aQ+1)^2 - 4a^2N'\varphi}}{2a^2N'} \leq r \leq \frac{(aQ+1) + \sqrt{(aQ+1)^2 - 4a^2N'\varphi}}{2a^2N'}. \quad (22)$$

It follows from (18) that  $F(B_r) \subset B_r$ . Based on Theorem 3, we can get that the equation (1) has solutions on  $B_r = \{D \in L^2([0, T], R_+), \|D\|_{L^2} \leq r\}$ . Therefore, the condition (ii) of Theorem 7 is satisfied.

Finally, we consider the case3:

Case3: If  $Q^2 - 4N'\varphi < 0$  and  $aQ+1 > 0$ , we derive from (19) that  $a \in [\frac{-1}{Q+2\sqrt{N'\varphi}}, 0)$ . Furthermore, by applying (18), we get

$$\frac{(aQ+1) - \sqrt{(aQ+1)^2 - 4a^2N'\varphi}}{2a^2N'} \leq r \leq \frac{(aQ+1) + \sqrt{(aQ+1)^2 - 4a^2N'\varphi}}{2a^2N'}. \quad (23)$$

It follows from (18) that  $F(B_r) \subset B_r$ . Based on Theorem 3, we can get that the equation (1) has at least one solution on  $B_r = \{D \in L^2([0, T], R_+), \|D\|_{L^2} \leq r\}$ . Therefore, the condition (iii) of Theorem 7 is satisfied. The proof is completed.

**THE PROOF OF THEOREM 8.** (i). Suppose that exists two elements  $D_1(t), D_2(t) \in B_r$  such that  $D_1 = FD_1$  and  $D_2 = FD_2$ . For a.e.  $t \in [0, T]$ , using the definition of positive and negative, we have

$$\begin{aligned} FD_1 - FD_2 &= ([P * H + aD_1 * V]^- * \Gamma_3)(t) \times [P * H(t) \\ &\quad + aD_1 * V(t)]^+ - ([P * H + aD_2 * V]^- \\ &\quad * \Gamma_3)(t) \times [P * H(t) + aD_2 * V(t)]^+ \\ &= \frac{1}{4}(|P * H + aD_1 * V| - (P * H + aD_1 * V)) \\ &\quad * \Gamma_3(t) \times (|P * H + aD_1 * V| + P * H \\ &\quad + aD_1 * V) - \frac{1}{4}(|P * H + aD_2 * V| \\ &\quad - (P * H + aD_2 * V)) * \Gamma_3(t) \\ &\quad \times (|P * H + aD_2 * V| + P * H + aD_2 * V). \end{aligned}$$

Moreover, applying the properties of absolute value  $|\cdot|$ , we have

$$\begin{aligned} |FD_1 - FD_2| &\leq \frac{1}{2}(|a(D_1 - D_2) * V| * \Gamma_3(t) + |a(D_1 - D_2) * K|) \\ &\quad \times (|P * H| + |aD_1 * V|) + \frac{1}{2}|a(D_1 - D_2) * V| \\ &\quad \times (|P * H| * \Gamma_3(t) + |aD_2 * V| * \Gamma_3(t) \\ &\quad + |P * S| + |aD_2 * K|). \end{aligned}$$

Applying the Hölder's inequality and  $(H_1)$ , the following inequality holds:

$$\begin{aligned} \|FD_1 - FD_2\|_{L^2} &\leq \left( a^2 r (\|V\|_{\infty} \Gamma_3 \|V\|_{L^2} T + \|K\|_{\infty} \|V\|_{\infty} T^{\frac{3}{2}}) \right. \\ &\quad - a \left( \frac{1}{2} \|P\|_{L^2} \|H\|_{\infty} \Gamma_3 \|V\|_{L^2} T + \frac{1}{2} \|P\|_{L^2} \right. \\ &\quad \|H\|_{\infty} \|K\|_{\infty} T^{\frac{3}{2}} + \frac{1}{2} \|P\|_{L^2} \|H\|_{L^1} \Gamma_3 \|V\|_{\infty} \\ &\quad \left. \left. T^{\frac{3}{2}} + \frac{1}{2} \|P\|_{L^2} \|S\|_{\infty} \|V\|_{\infty} T^{\frac{3}{2}} \right) \|D_1 - D_2\|_{L^2}. \quad (24) \end{aligned}$$

In view of  $Q^2 - 4N'\varphi = 0$  and  $a \in [-\frac{1}{2Q}, 0)$ , we derive from (24) that

$$\|FD_1 - FD_2\|_{L^2} = (-aQ + 2a^2N'r) \|D_1 - D_2\|_{L^2}, \quad (25)$$

where  $0 \leq (-aQ + 2a^2N'r) < 1$ . This implies that  $F$  is contraction. (ii). If  $Q^2 - 4N'\varphi < 0$  and for any  $a \in [\frac{-1}{Q+2\sqrt{N'\varphi}}, 0)$ , from (24), we have

$$\|FD_1 - FD_2\|_{L^2} \leq (-aQ + 2a^2N'r)\|D_1 - D_2\|_{L^2} \quad (26)$$

and  $0 \leq (-aQ + 2a^2N'r) < 1$ , which leads to the operator  $F$  is contraction. Consequently, we get  $D_1 = D_2$ . The proof is completed.
