# Supplementary figures and images for: Mathematical study of neural feedback roles in small target motion detection
Source: Frontiers journal article supplement (doi:10.3389/fnbot.2022.984430), 2022-09-20

**A**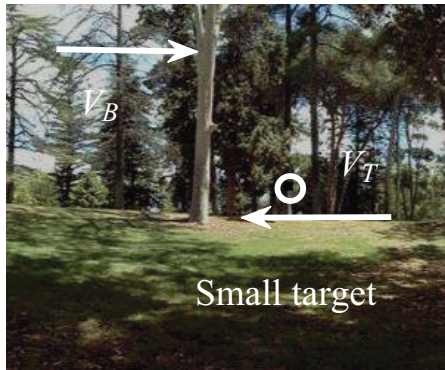

A frame of the initial  
sequence

**B**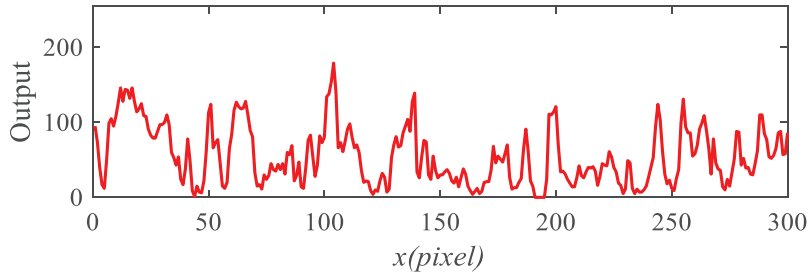

The input signal

Supplement: Data_Sheet_1.ZIP [file Data_Sheet_1.ZIP]

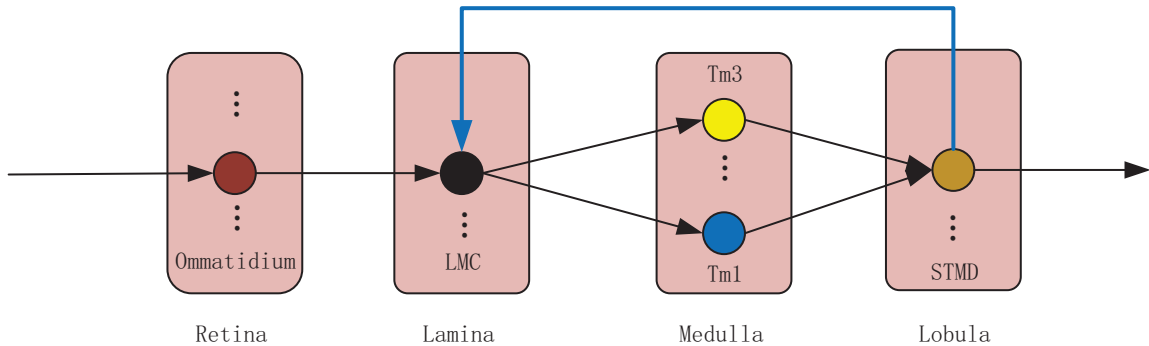

Supplement: Data_Sheet_1.ZIP [file Data_Sheet_1.ZIP]

**A**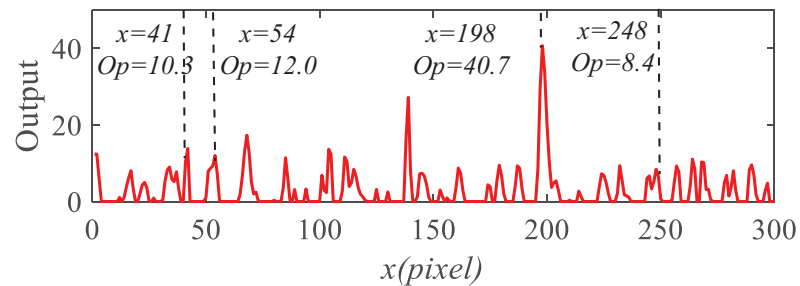

Original ON outputs

**B**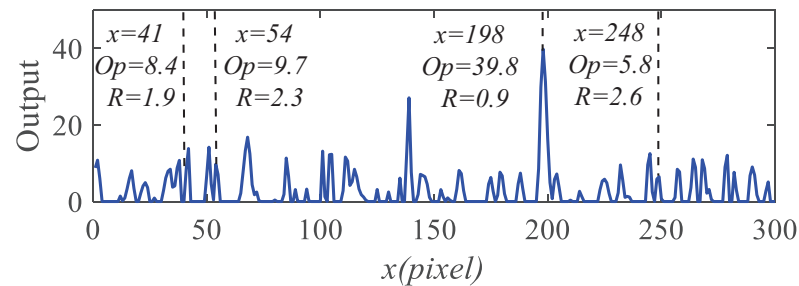

Feedback ON outputs

**C**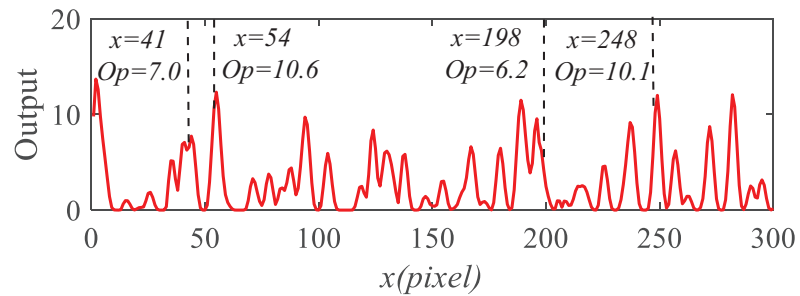

Original OFF outputs

**D**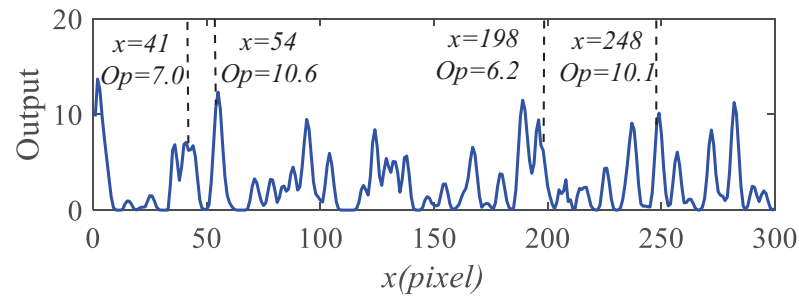

Feedback OFF outputs

Supplement: Data_Sheet_1.ZIP [file Data_Sheet_1.ZIP]

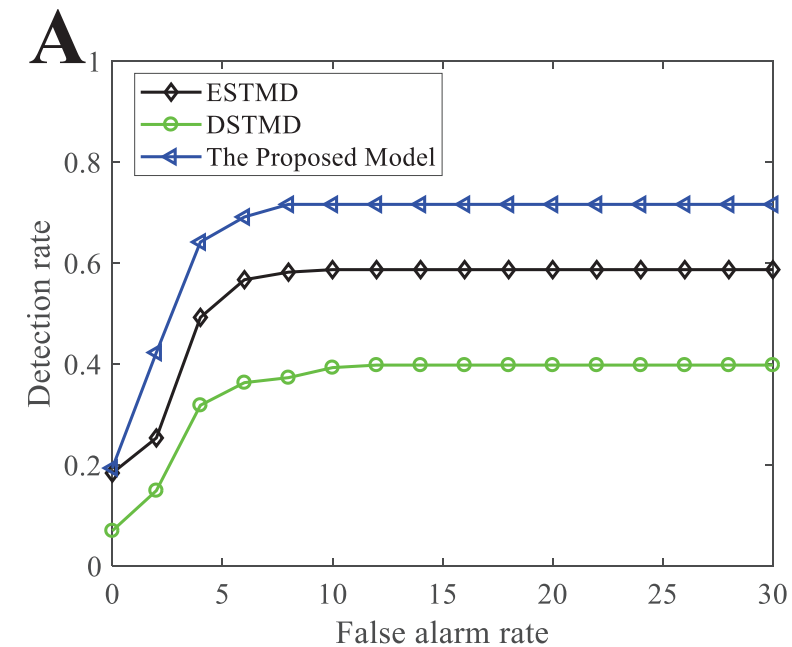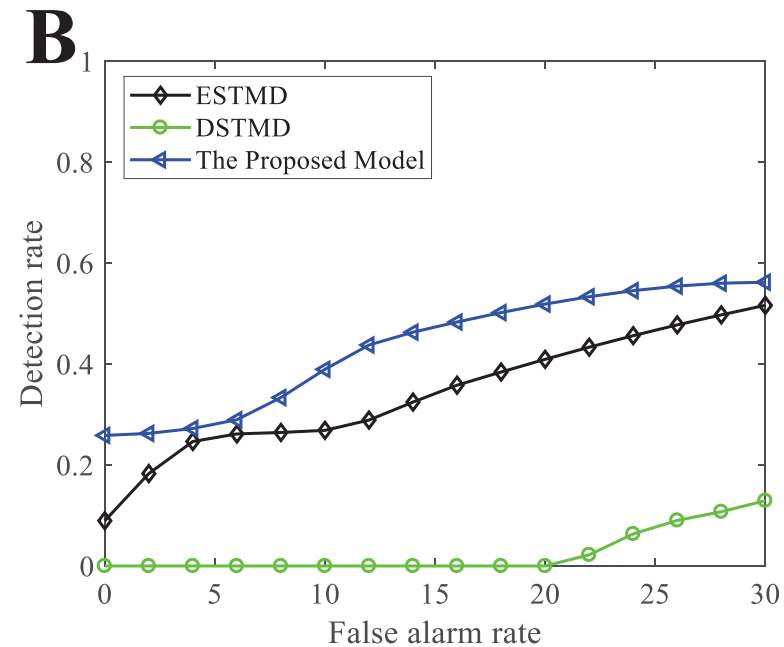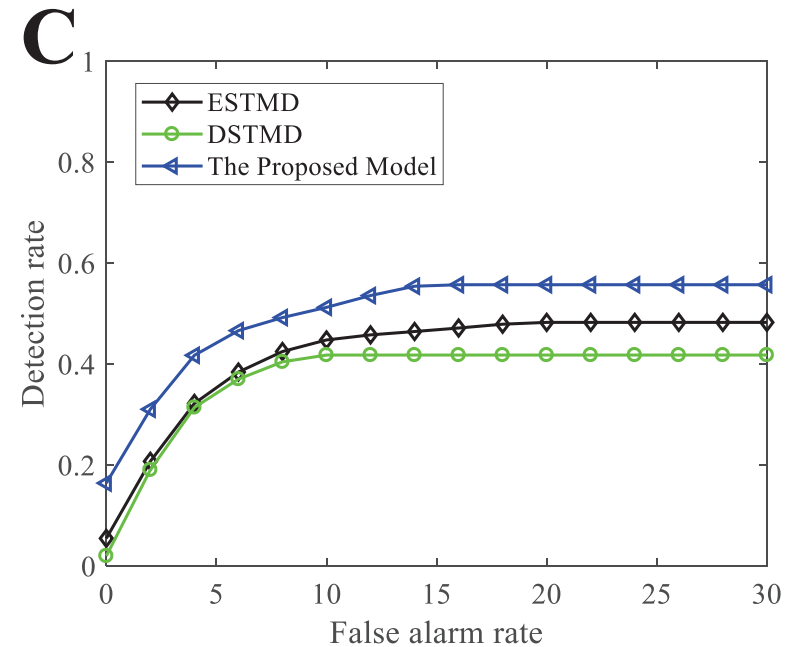

Supplement: Data_Sheet_1.ZIP [file Data_Sheet_1.ZIP]

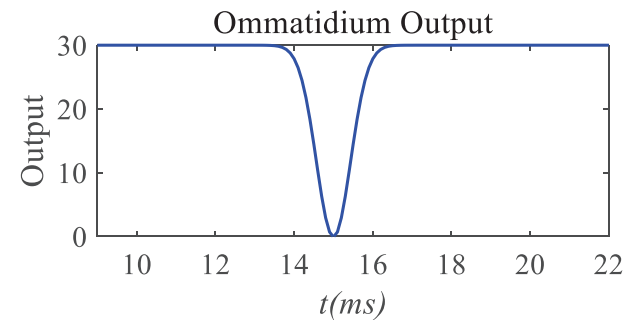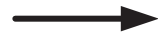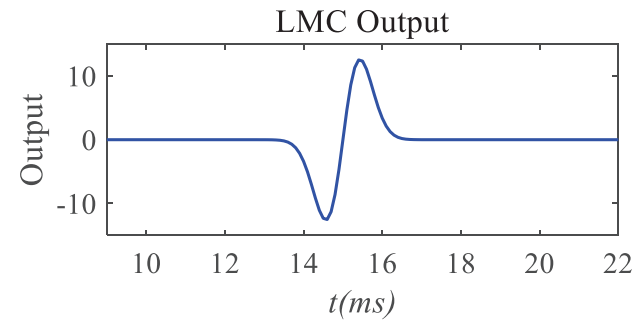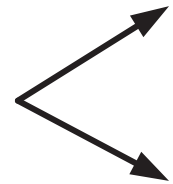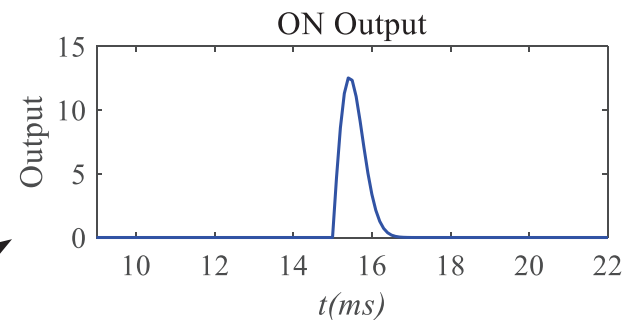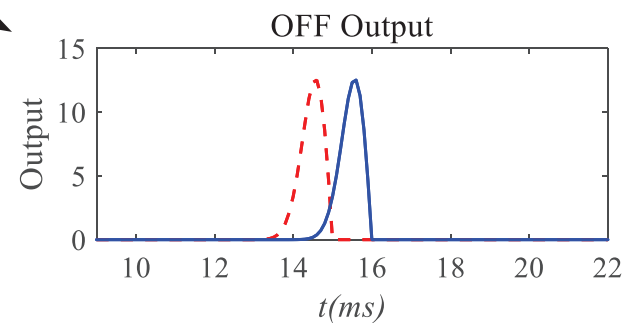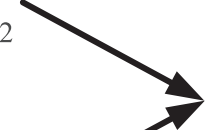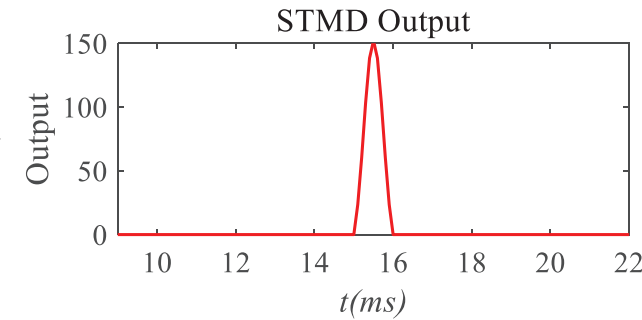

Supplement: Data_Sheet_1.ZIP [file Data_Sheet_1.ZIP]

**A**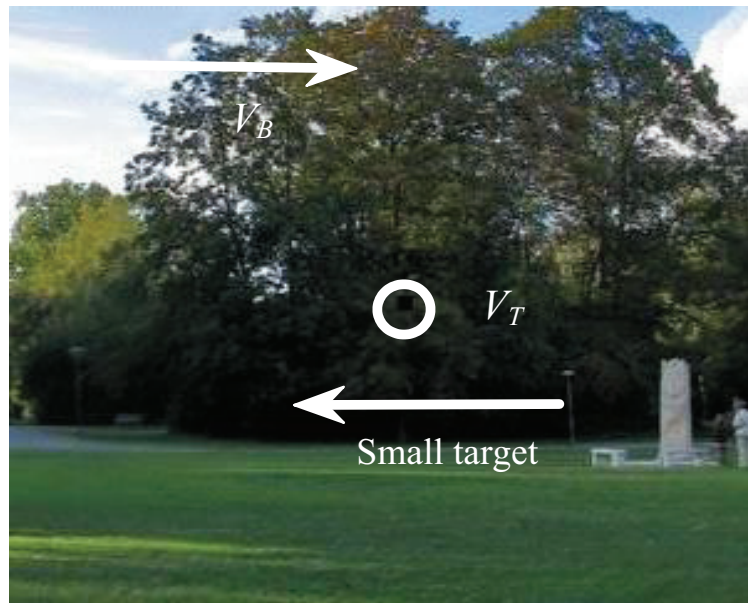

A frame of the initial sequence

**B**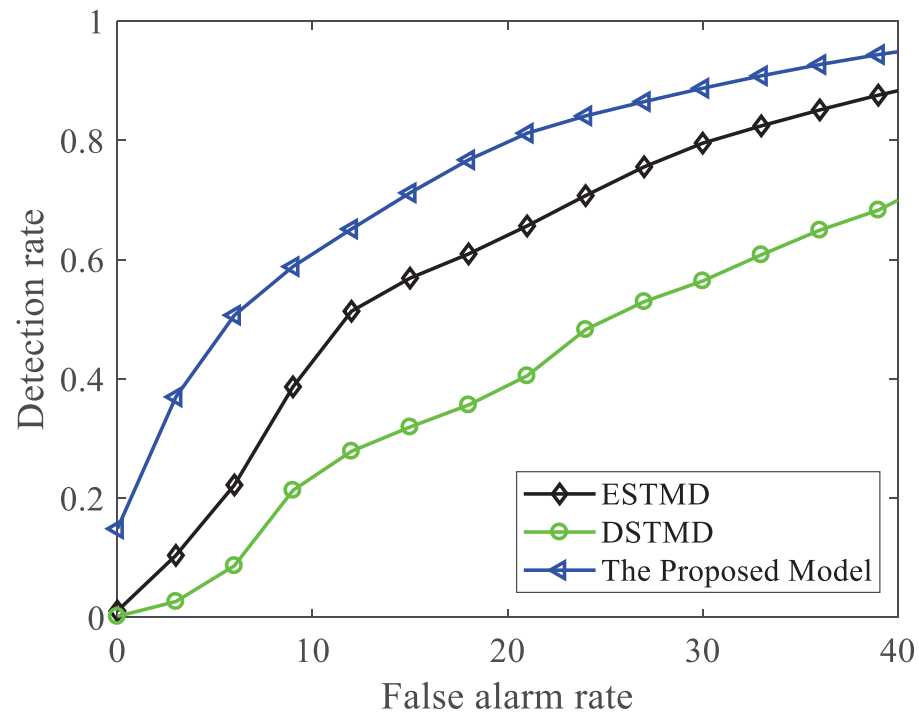

The detection rate curves of the initial image sequence

Supplement: Data_Sheet_1.ZIP [file Data_Sheet_1.ZIP]

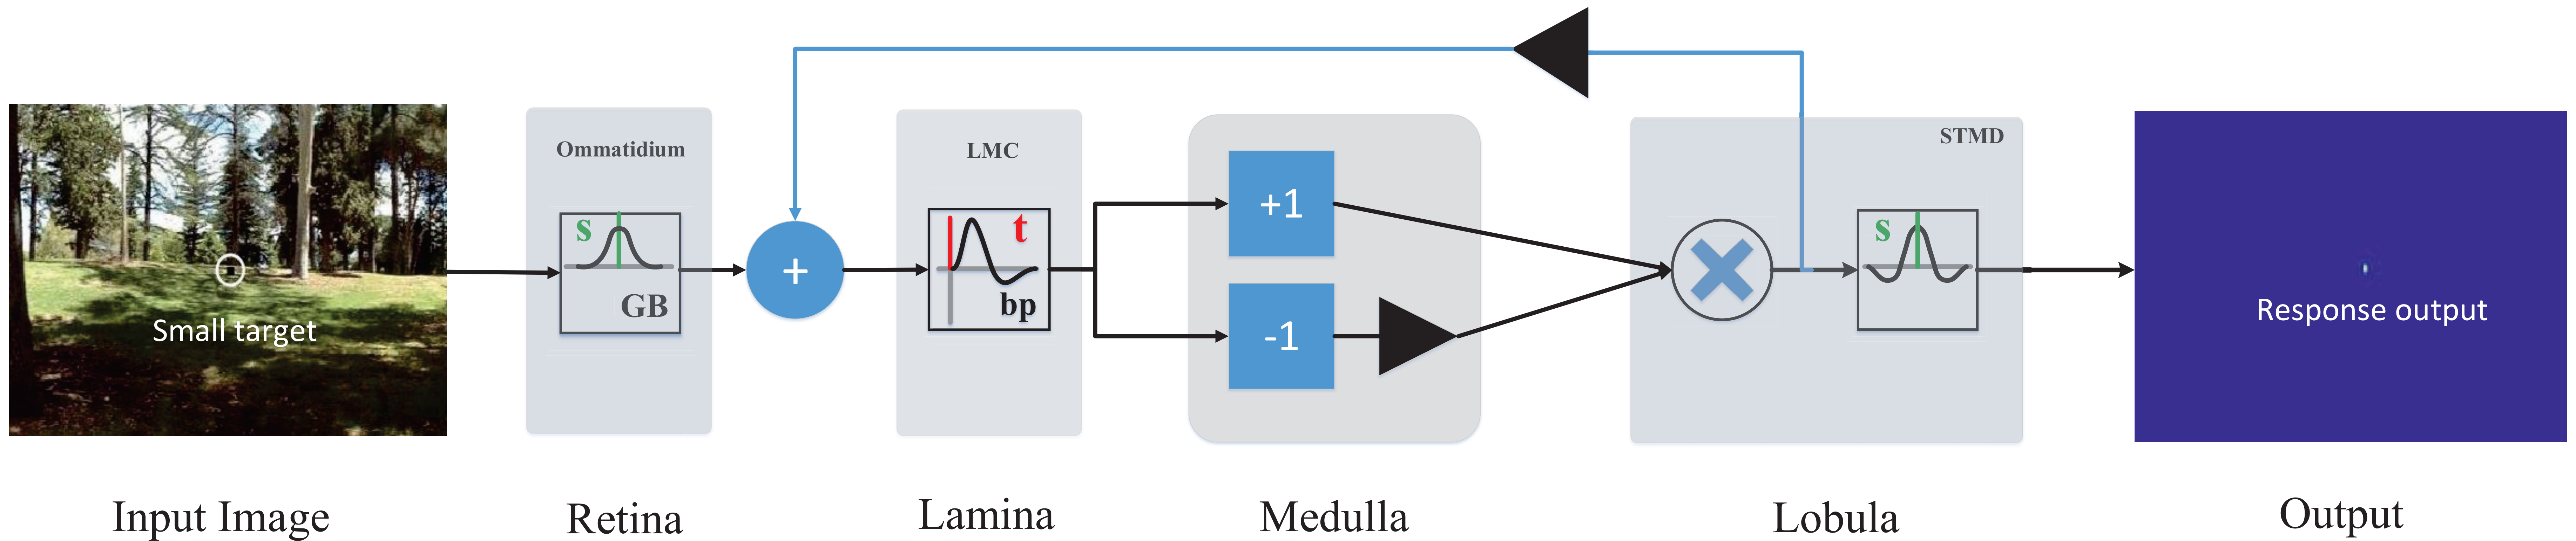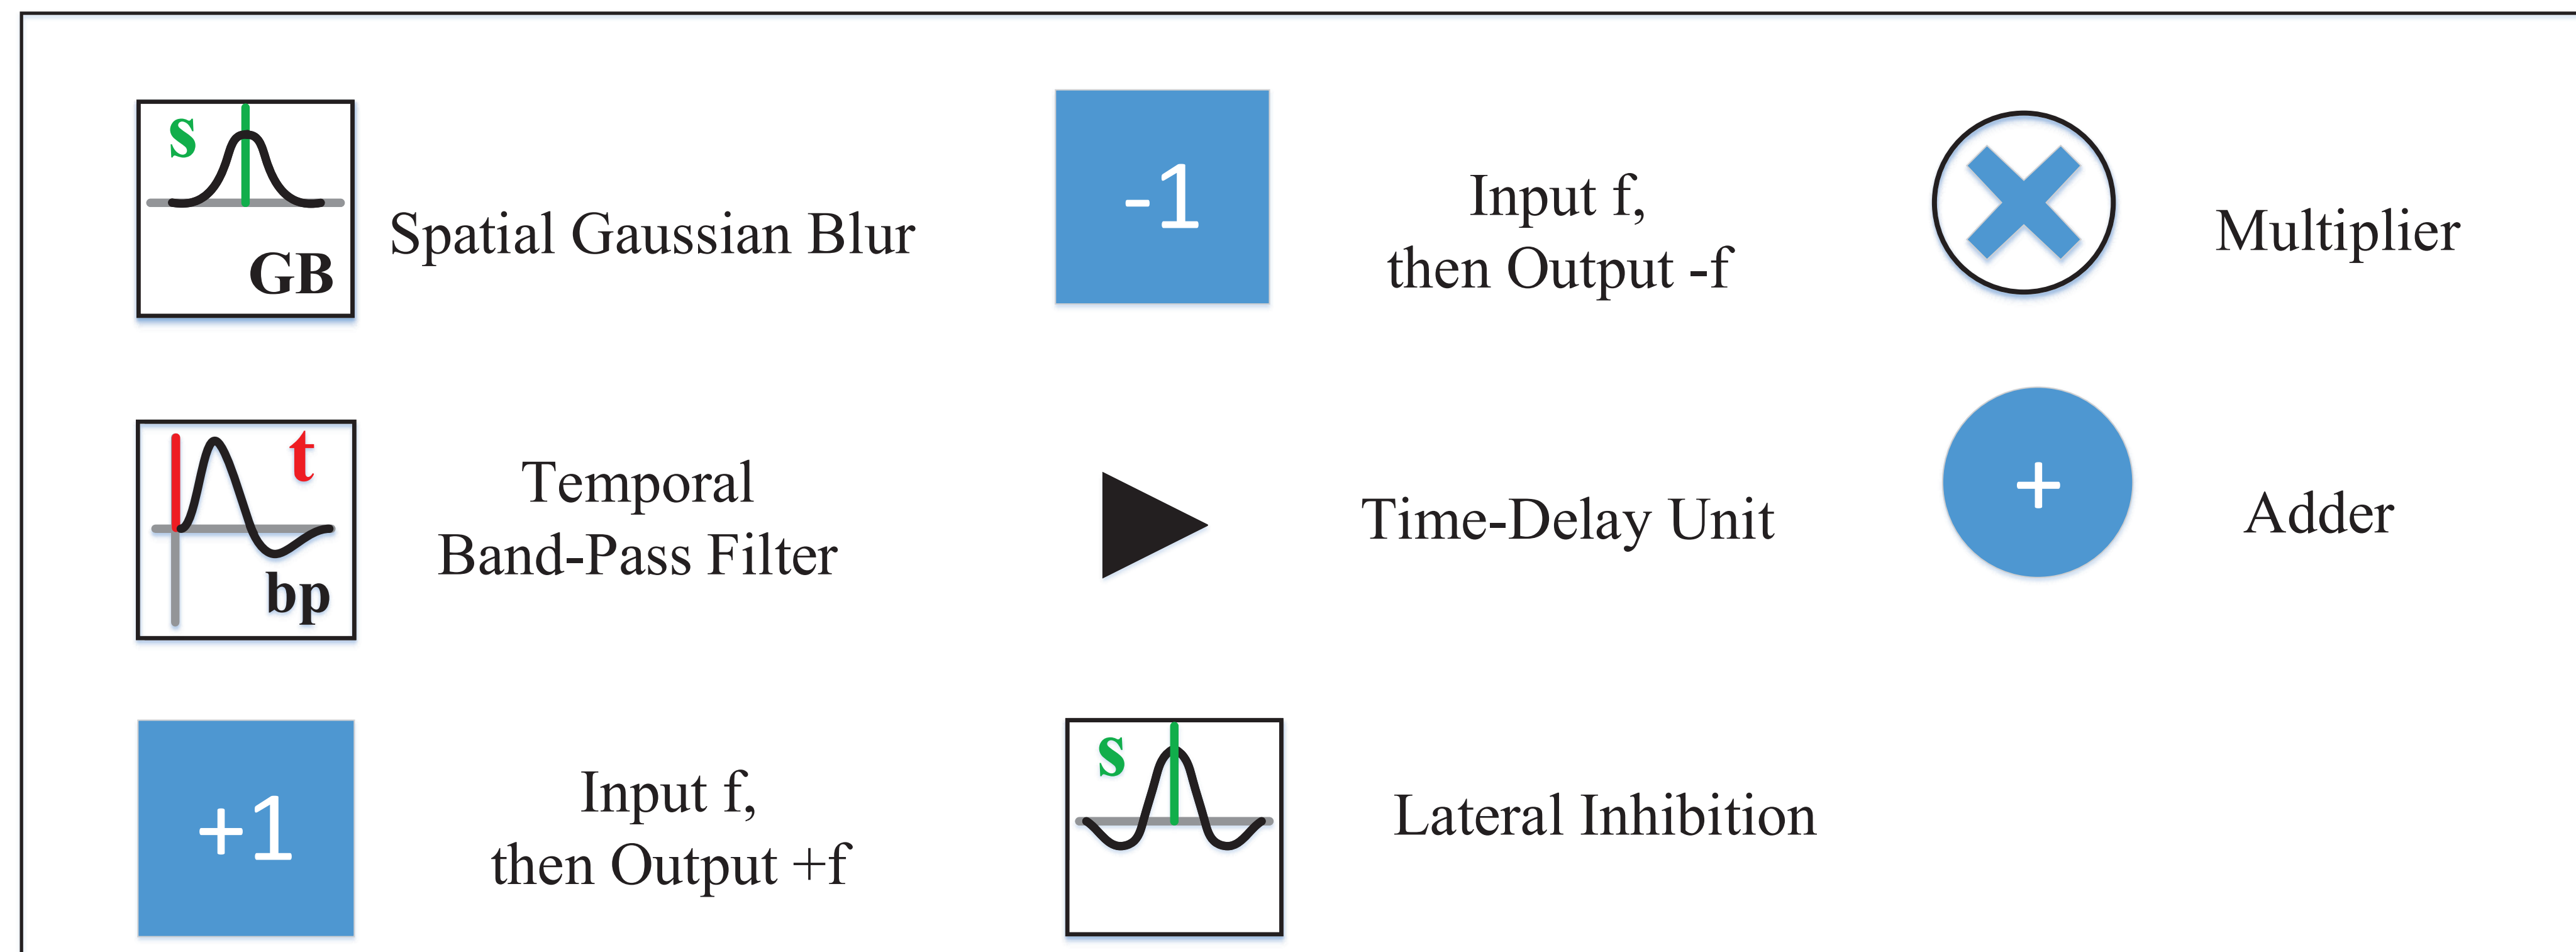

Supplement: Data_Sheet_1.ZIP [file Data_Sheet_1.ZIP]

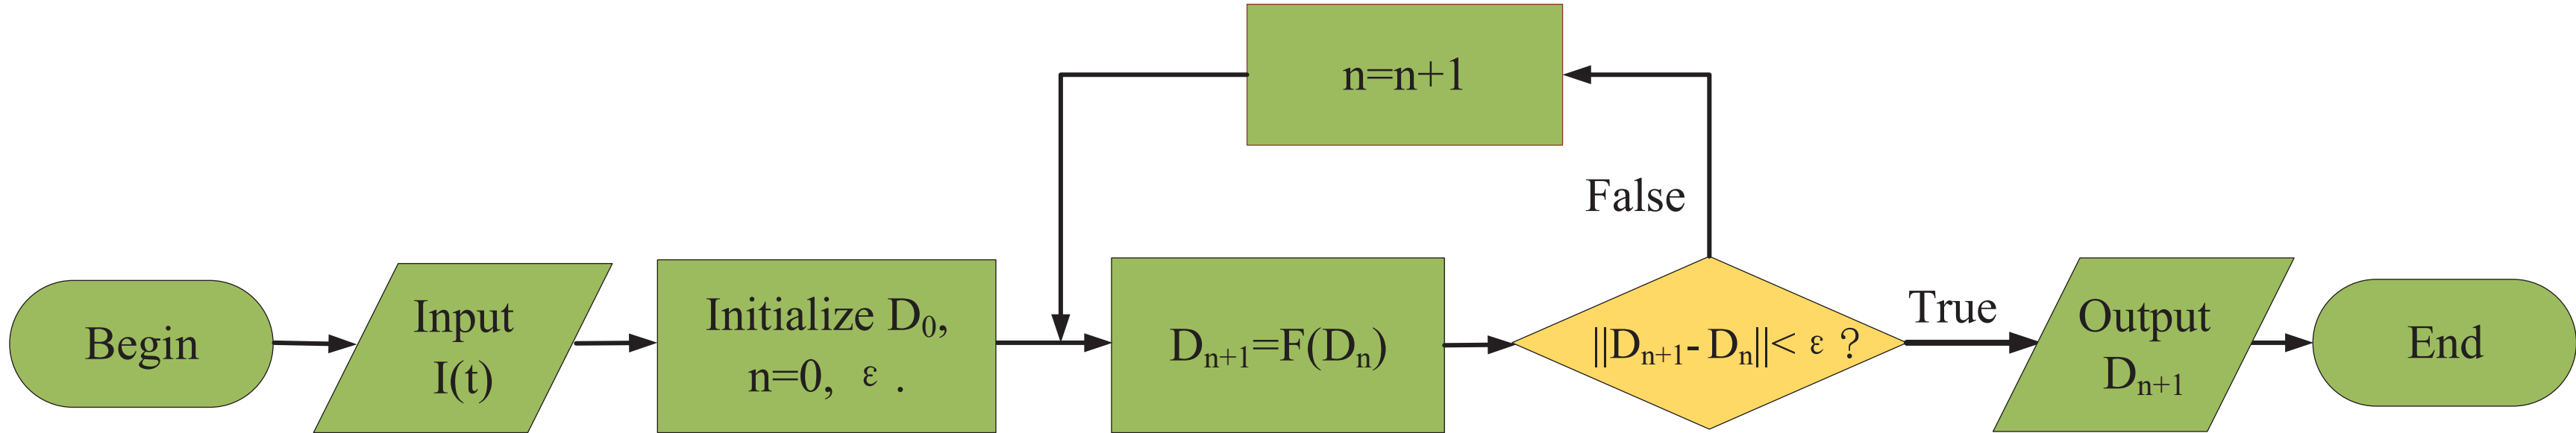

Supplement: Data_Sheet_1.ZIP [file Data_Sheet_1.ZIP]

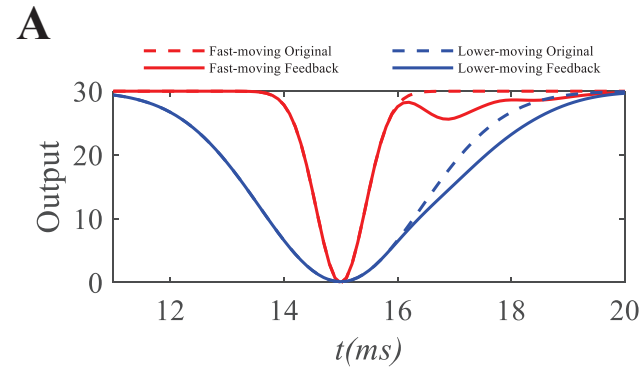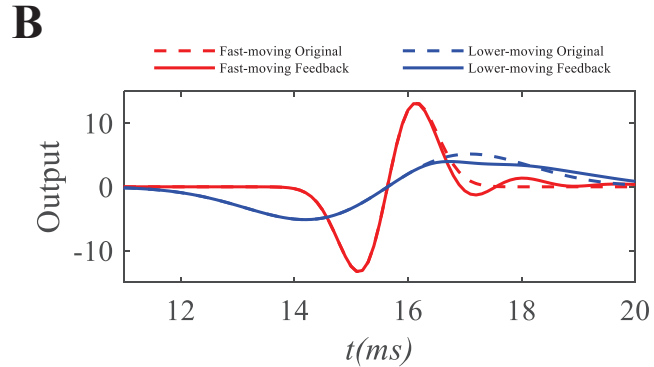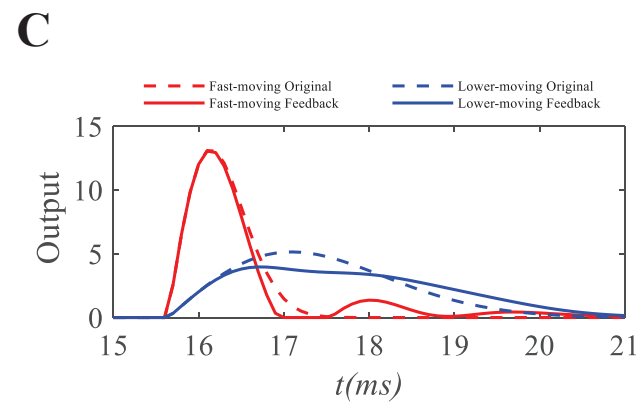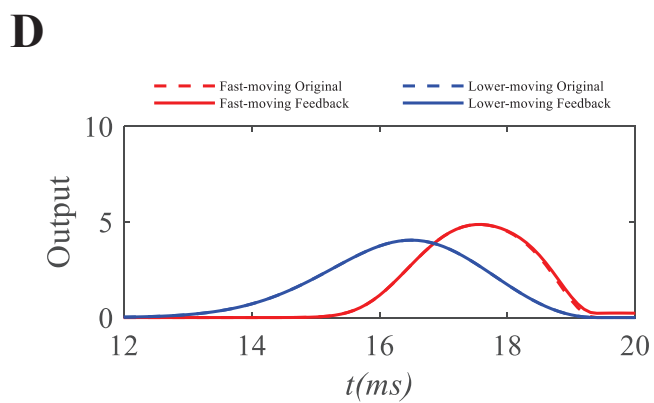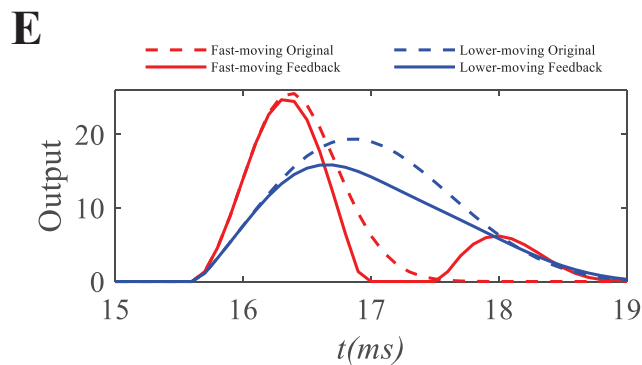

Supplement: Data_Sheet_1.ZIP [file Data_Sheet_1.ZIP]

A

frontiers  
FOR YOUNG MINDS

B

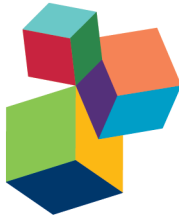

Supplement: Data_Sheet_1.ZIP [file Data_Sheet_1.ZIP]

**A**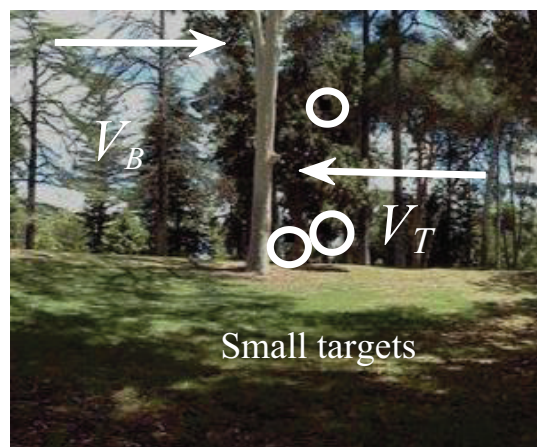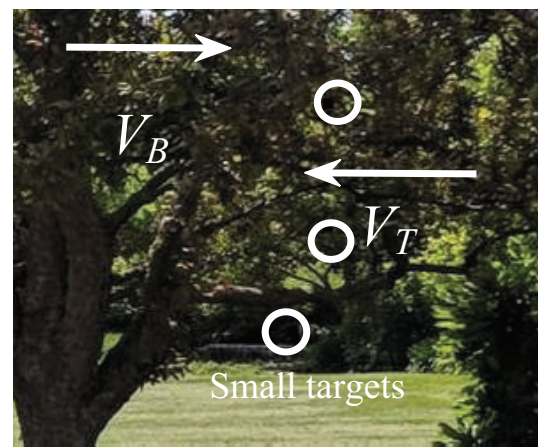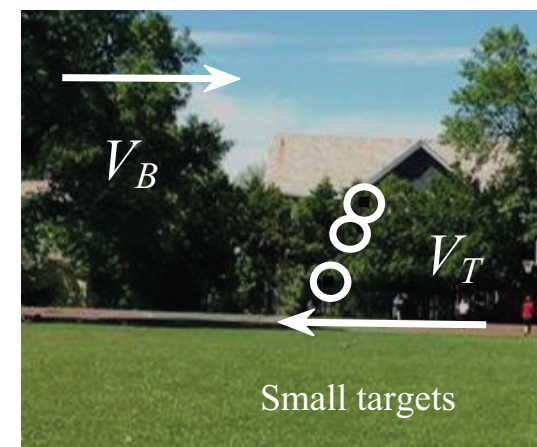**B**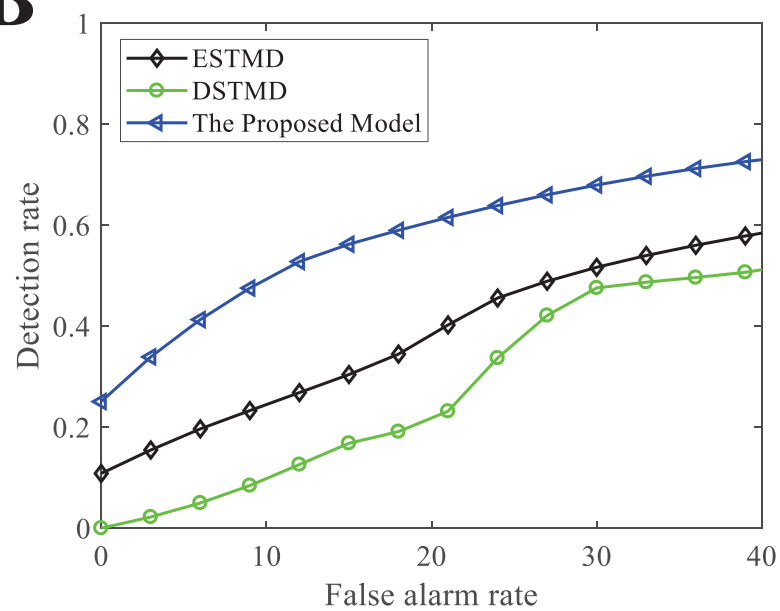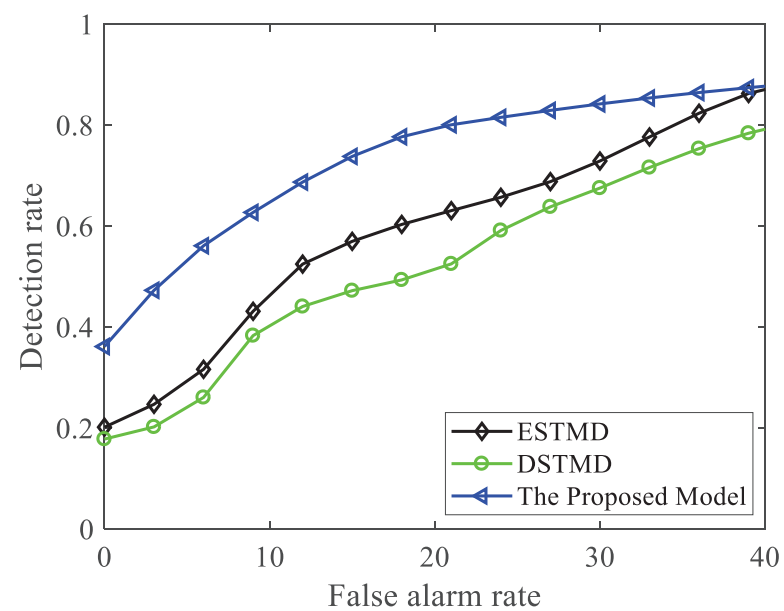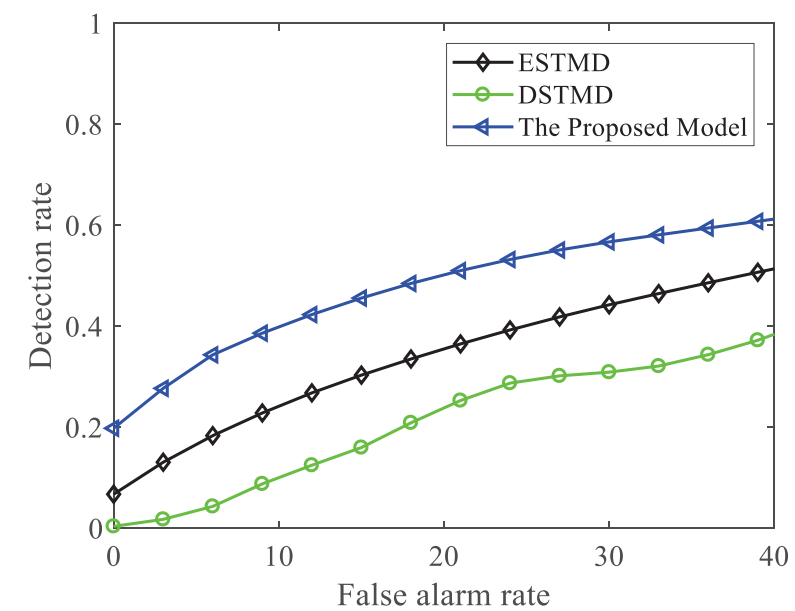**C**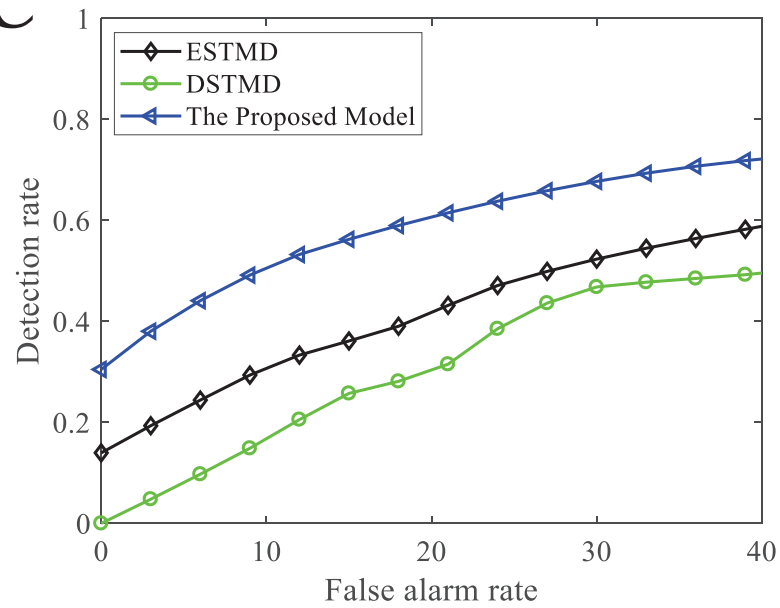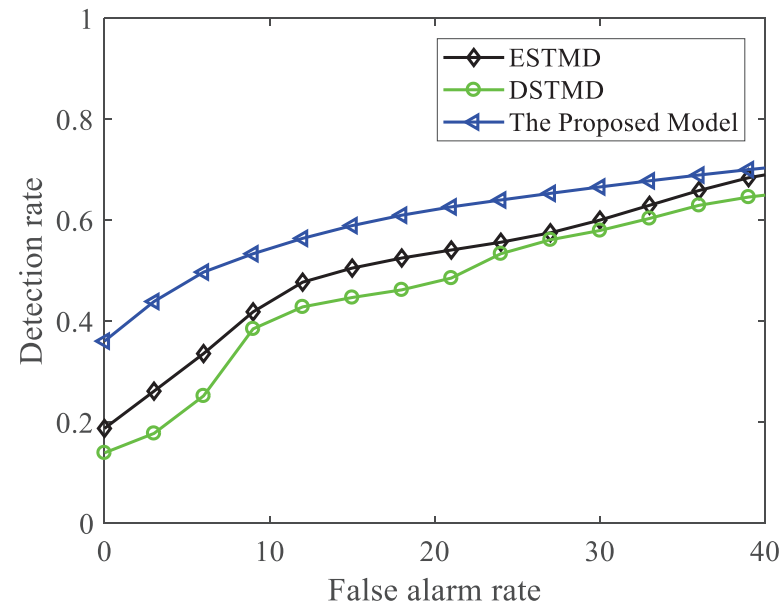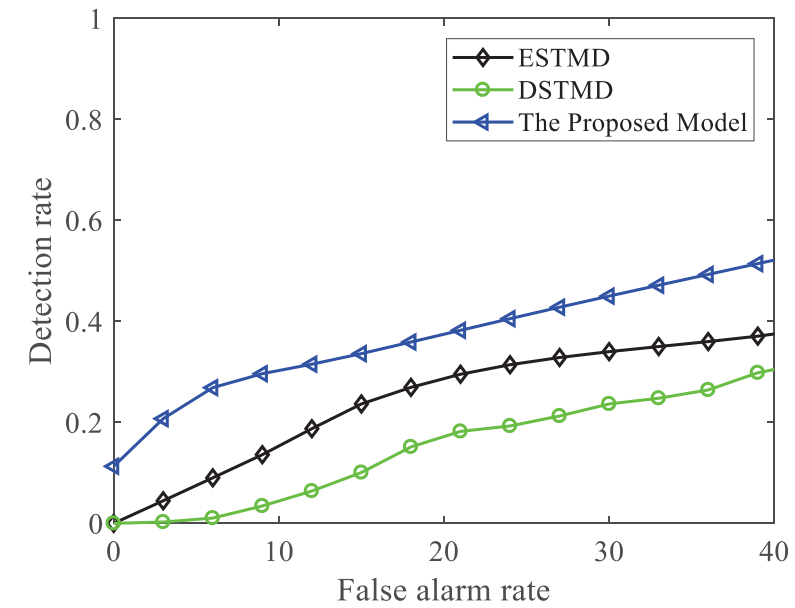

Supplement: Data_Sheet_1.ZIP [file Data_Sheet_1.ZIP]

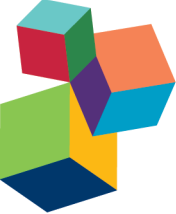

frontiers

Supplement: Data_Sheet_1.ZIP [file Data_Sheet_1.ZIP]
